# Supplementary material for: Electrode potential dominates the reversibility of lithium metal anodes
Source: Research Square preprint supplement (doi:10.21203/rs.3.rs-1274809/v1), 2022-02-01
Supplement: Supplementary file 1 [file c8f4a253af99d395c32a08b2.docx]

Supplementary Information

Electrode potential dominates the reversibility of lithium metal anodes

Seongjae Ko1, Tomohiro Obukata1, Tatau Shimada1, Norio Takenaka,1, Masanobu Nakayama2,

*Atsuo Yamada1**, *Yuki Yamada1,3**

1. Department of Chemical System Engineering, The University of Tokyo, 7-3-1, Hongo, Bunkyo-ku, Tokyo 113-8656, Japan

2. Department of Advanced Ceramics, Nagoya Institute of Technology, Gokiso, Showa, Nagoya, Aichi 466-8555, Japan

3. SANKEN (The Institute of Scientific and Industrial Research), Osaka University, Mihogaoka 8-1, Ibaraki, Osaka 567-0047, Japan

**Corresponding Author**

*E-mail: Atsuo Yamada; yamada@chemsys.t.u-tokyo.ac.jp

*E-mail: Yuki Yamada; yamada@sanken.osaka-u.ac.jp

KEYWORDS: Lithium Metal Batteries, Plating/stripping, Coordination, Redox potential

**Figure S1.** The electrode potential of Li (*E*Li) in 74 electrolytes; lithium bis(fluorosulfonyl)imide (LiFSI)/1,2-dimethoxyethane (DME) (1:8.9, 1:6.0, 1;4.0, 1;3.0, 1;2.0, 1;1.4, n;n), 1.5 mol L-1 (M) LiFSI/DME:highly fluorinated ether (1,1,2,2-tetrafluoroethyl 2,2,3,3-tetrafluoropropyl ether, HFE) (9/1, 7/3, 6,4, 5/5, 4/6, n/n), 1.5 M LiFSI/DME:toluene (9/1, 7/3, 5/5, 4/6, 3.5/6.5, n/n), LiFSI/tetrahydrofuran (THF) (1:11.6, 1:7.1, 1:5.1, 1:3.0, 1:2.0, 1;1.4, 1:1.1, n:n), 1.5 M LiFSI/THF:toluene (9/1, 7/3, 5/5, 4/6, 3.5/6.5, n/n), LiFSI/dimethoxymethane (DMM) (1:10.3, 1:6.6, 1:4.8, 1:2.9, 1:1.9, 1:1.3, n:n), LiFSI/1,4-dioxane (1:10.7, 1:8.0, 1:6.7, n:n), LiFSI/diglyme (G2) (1:6.4, 1:4.3, 1:4.0, 1:3.5, n:n), LiFSI/methyl (2,2,2-trifluoroethyl) carbonate (FEMC) (1:7.8, 1:6.0, 1:4.0, 1:3.0, 1:2.0, 1:1.8, n:n), LiFSI/sulfolane (1:9.5, 1:8.0, 1:6.0, 1:4.0, 1:3.0, 1:2.5, n:n), LiFSI/ethylene carbonate (EC) (1:13.8, 1:10, 1:8.0, 1:6.0, 1:4.0, 1:3.0, 1:2.0, 1:1.5, n:n), LiFSI/propylene carbonate (PC) (1:10.6, 1:8.0, 1:6.0, 1:4.0, 1:3.0, 1:2.0, 1:1.5, n:n), LiFSI/ fluoroethylene carbonate (FEC) (1:12.9, 1:10, 1:8.0, 1:6.0, 1:4.0, 1:3.0, n:n). The concentration variation is from 1.0 M to nearly saturated. The redox potential of 1 mM ferrocene was used as a reference.

**Figure S2.** The average CE of Li plating/stripping reactions with 74 electrolytes. The Li | Cu cells are used for plating/stripping tests under the conditions (plating at a constant current density of 0.5 mA cm-2 for 1 hour, stripping with a cut-off voltage of 0.5 V). The deposited area of Li on Cu foil was 1.13 cm2 (diameter 1.2 cm). The glass fiber separator was used. The average CE was calculated from a second to ~20 cycleswith three cells. The CE of the first cycle (SEI formation process) was excluded because we put more focus on the CE after SEI formation.

**Figure S3.** Cyclic voltammograms of 1 mM ferrocene (Fc) dissolved in the given electrolytes on Pt at 5 mV s-1.

**Figure S4.** XPS spectra of cycled Cu in the given electrolytes. The salt derived F, N, and S components/moieties (F-S, LiF, S-N-S, Li-N, and S=O) were detected on the surface of the cycled Cu electrode, regardless of the type of electrolyte.

**Figure S5.** SEM images of deposited Li on Cu foil in (a) 1.5 M LiFSI/G2, (b) 1.5 M LiFSI/DME, and (c) 1.5 M LiFSI/DMM. The morphology of deposited Li was similar regardless of the type of electrolyte.

**Figure S6.** (a) Anomeric effect of a DMM molecule. DMM favors a sterically hindered *gauche*-*gauche* confirmation, which is not suitable for chelation. (b) Optimized 3D geometric structures of 1.5 M LiFSI/diglyme (G2), 1.5 M LiFSI/DME, and 1.5 M LiFSI/DMM (H : light grey, C : cobalt green, O : red). The 3D trajectory of Li+ around one specific solvent is demonstrated as a blue area. The and represent the difference in Li+-solvation Gibbs free energies of diglyme (G2) and DMM, respectively, with regard to DME. The solvation Gibbs free energies were calculated with ESM-RISM.

**Figure S7.** Raman peak position of FSI- anion of 74 electrolytes in the ranges of (a) 700-760 cm-1 (*v*s(S-N-S)) and (b) 1205-1235 cm-1 (*v*(S=O)). The Raman peak position represents the ion-pairing state of Li+-FSI-.

**Figure S8.** (a) Raman spectra of LiFSI/sulfolane electrolytes, where the Raman signals of FSI- anion (*v*s(S-N-S)) are overlapped with a weak signal of sulfolane (*v*(C-S-C)) at 735 cm-1. (b) *E*Li of various electrolytes plotted against the Raman peak positions of FSI- in the range of 1205-1235 cm-1 (*v*(S=O)), avoiding the influence of strong solvent-derived peaks a of EC, PC, or FEC at around 720 cm-1, which overlaps the peak of FSI- (*v*s(S-N-S)). A clear relationship between the *E*Li and the Raman peak position was obtained even though the peak for (*v*(S=O)) at 1205-1235 cm-1is much smaller in shift amplitude with poorer resolution than those for *v*s(S-N-S) at 700-760 cm-1.

**Figure S9.** (a) Raman spectra of 1.5 M LiFSI/DME:toluene with various mole fractions of toluene. The Raman band in a range of 700 to 760 cm-1 is derived from the vibration of FSI- anion, which represents the states of Li+-FSI- ion pairs. (b) Electrode potentials of Li (*E*Li) in 1.5 M LiFSI/DME:toluene with various mole fractions of toluene including 1 mM ferrocene. The redox potential of ferrocene was used as a reference. (c) CE during Li plating/stripping reactions on Cu with the given electrolytes. The introduction of toluene upshifts the *E*Li by extensive formation of Li+ and FSI- ion pairs, thus contributing to a stable Li plating/stripping with high CE (~99.3 %) over 400 cycles. A PP separator was used.
